# Supplementary material
Source: Springer Nature journal article supplement (https://www.springermedizin.de/resource/supplementary/13690_2011_17_MOESM2_ESM.pdf/9422458)
Supplement: MOESM2 [file 9422458]

### Survival Functions

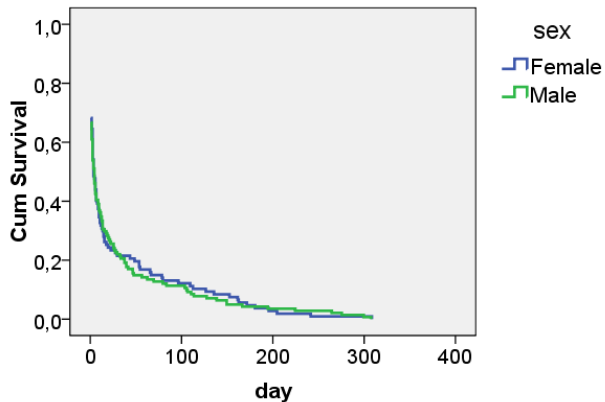

### Log Survival Function

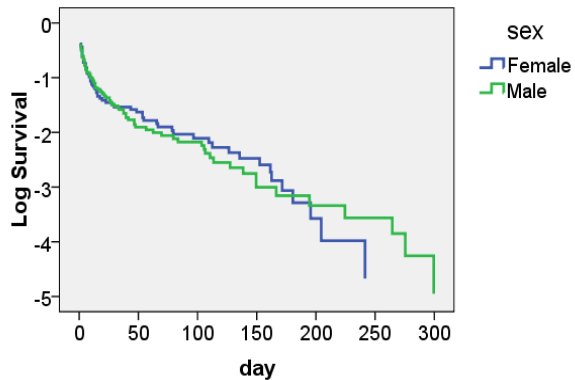

- N = 141 males and 107 females
- Mean survival time = 29.6 days (SD=5.09 days) in males; 31.0 days (SD = 5.76 days) in females
- Breslow chi-square = 0.023, df = 1, P = 0.88
